# Supplementary material
Source: publisher figshare collection journal article supplement (https://frontiersin.figshare.com/ndownloader/files/14101520)
Supplement: Supplementary file [file 14101520]

**Table S4.** Genes used in cDC, CD8+ DC and pDC gene signatures.

Gene sets with specific expression in cDC, CD8+ DC or pDC subsets were compiled using data from Miller et al., 2012.

Subset specific signature genes were used to create heatmaps of differential gene expression across DC subsets in the microarray

| cDC Gene Signature | CD8+ DC Gene Signature | pDC Gene Signature |
|--------------------|------------------------|--------------------|
| 1700025G04Rik      | 1700009J07Rik          | 1190002A17Rik      |
| 2810417H13Rik      | 5430435G22Rik          | 1700024P16Rik      |
| 4930506M07Rik      | A530099J19Rik          | 2210020M01Rik      |
| 5033414K04Rik      | Aif1                   | 2610018G03Rik      |
| Adam23             | Alms1                  | 4930572J05Rik      |
| Adam8              | Cd36                   | A130050O07Rik      |
| Aim1               | Dbn1                   | Abca5              |
| Anpep              | Fam149a                | Ablim1             |
| Anxa1              | Fgd6                   | Angptl7            |
| Arhgap26           | Fzd1                   | Ap1m2              |
| Arrb1              | Gpr33                  | Arhgap24           |
| Asap1              | Hepacam2               | Asph               |
| Asb2               | Htr7                   | Blnk               |
| Atf3               | Ifi205                 | Cacna1d            |
| Atp8b4             | Igf2r                  | Card6              |
| Batf3              | Ipcef1                 | Cdc14b             |
| Bcl2a1a            | Itga1                  | Cdh1               |
| Bcl2a1b            | Itgae                  | Clec4g             |
| Bcl2a1c            | Leprel1                | Cmah               |
| Bcl2a1d            | Met                    | Dnajc13            |
| Bub1               | Ppap2a                 | Duxbl              |
| Bub1b              | Sh3pxd2b               | Ear14              |
| C130092O11Rik      | Slc22a21               | Efcab4b            |
| Ccna2              | Snx22                  | Erbb3              |
| Ccnb2              | Tlr3                   | Eya1               |
| Ccr12              | Tmeff1                 | Fads3              |
| Cd80               | Ttc39a                 | Fam169b            |
| Cd81               | Xcr1                   | Fggy               |
| Cd83               |                        | Figf               |
| Cd86               | <b>No. Genes: 28</b>   | Gcom1              |
| Cd9                |                        | Gimap1             |
| Cdca7              |                        | Gimap9             |
| Cep55              |                        | Gm10790            |
| Chn2               |                        | Gm10838            |
| Cxcl16             |                        | Gm12253            |
| Ddef2              |                        | Gm14207            |
| Dlgap5             |                        | Gm6498             |
| Dna2               |                        | Gpr174             |
| Dock5              |                        | Gria3              |
| Dock7              |                        | Grm8               |

|         |  |
|---------|--|
| E2f8    |  |
| Ear2    |  |
| Egr1    |  |
| Eps8    |  |
| Errfi1  |  |
| Fam38a  |  |
| Fgl2    |  |
| Gatm    |  |
| Gm11545 |  |
| Gm6377  |  |
| Gpr124  |  |
| Gpr82   |  |
| Grk5    |  |
| Havcr2  |  |
| Hk2     |  |
| Hnrpl   |  |
| Id2     |  |
| Ifitm2  |  |
| Igsf6   |  |
| Il1b    |  |
| Kif11   |  |
| Kif23   |  |
| Klri1   |  |
| Lfng    |  |
| Lpcat2  |  |
| Lpcat4  |  |
| Lrrc25  |  |
| Lrrk2   |  |
| Lrrk2   |  |
| Ly75    |  |
| Lyz1    |  |
| Mctp1   |  |
| Melk    |  |
| Mki67   |  |
| Mllt4   |  |
| Myc     |  |
| Nav1    |  |
| Ncapg   |  |
| Nck2    |  |
| Nck2    |  |
| Neurl3  |  |
| Nlrp1b  |  |
| Nlrp1c  |  |
| Nostrin |  |
| Nr4a3   |  |
| Nuf2    |  |
| Pak1    |  |
| Parp12  |  |
| Pglyrp1 |  |

|          |  |
|----------|--|
| Hs3st1   |  |
| Hsd11b1  |  |
| Igf1r    |  |
| Ikzf2    |  |
| Ikzf3    |  |
| Il17rb   |  |
| Itsn1    |  |
| Klk1     |  |
| Klk1b21  |  |
| Klra17   |  |
| Ldhb     |  |
| Lynx1    |  |
| Maged1   |  |
| Mcart6   |  |
| Mctp2    |  |
| Mgst2    |  |
| Obscn    |  |
| Olf164   |  |
| Olf165   |  |
| Olf166   |  |
| P2ry12   |  |
| Pacsin1  |  |
| Paqr5    |  |
| Pdzd4    |  |
| Peli2    |  |
| Pkig     |  |
| Plod2    |  |
| Pnck     |  |
| Ppm1e    |  |
| Ppm1l    |  |
| Prkca    |  |
| Prrg4    |  |
| Rpgrip1  |  |
| Scrn1    |  |
| Sit1     |  |
| Slc39a14 |  |
| Slco4a1  |  |
| Srl      |  |
| St3gal6  |  |
| Tmem163  |  |
| Upb1     |  |
| Wfs1     |  |
| Xkrx     |  |
| Ysk4     |  |
| Zc3h12b  |  |
| Zcchc24  |  |
| Zfp521   |  |
| Zfp658   |  |

|                                                                                                                                                                                                                                                                                                                                                                                         |  |                      |
|-----------------------------------------------------------------------------------------------------------------------------------------------------------------------------------------------------------------------------------------------------------------------------------------------------------------------------------------------------------------------------------------|--|----------------------|
| Pole<br>Prkar2a<br>Pstpip2<br>Ptpn22<br>Pvrl1<br>Rab11fip1<br>Rab31<br>Rab32<br>Ralb<br>Rasgef1b<br>Rasgrp3<br>Rnf144b<br>Rnf150<br>Rrm2<br>Rtn1<br>Sash1<br>Sgk1<br>Slamf8<br>Spint1<br>Spire1<br>Spred1<br>St3gal5<br>Sulf2<br>Tgfbf<br>Tlr11<br>Tlr13<br>Tnfrsf21<br>Top2a<br>Tpx2<br>Tspan33<br>Ttc39b<br>Ttc39b<br>Tubb6<br>Wdfy3<br>Zbtb46<br>Zfp366<br><br><b>No. Genes: 125</b> |  | <b>No. Genes: 88</b> |
|-----------------------------------------------------------------------------------------------------------------------------------------------------------------------------------------------------------------------------------------------------------------------------------------------------------------------------------------------------------------------------------------|--|----------------------|
